# Supplementary material for: A hybrid solid-state electrolyte endows a Li metal battery with excellent cycling life at 120 °C
Source: Royal Society of Chemistry journal article supplement (doi:10.1039/d3ta01588b), 2023-01-01
Supplement: d3ta01588b1.pdf [file d3ta01588b1.pdf]

## Supplementary Information

### **A Hybrid Solid-State Electrolyte Endows Li Metal Battery with Excellent Cycling Life at 120 °C**

Wen-Xue Liu,<sup>a</sup> Xue-Chun Huang,<sup>b</sup> Yan Meng,<sup>\*c</sup> Dan Xiao,<sup>\*b</sup> Yong Guo<sup>\*a</sup>

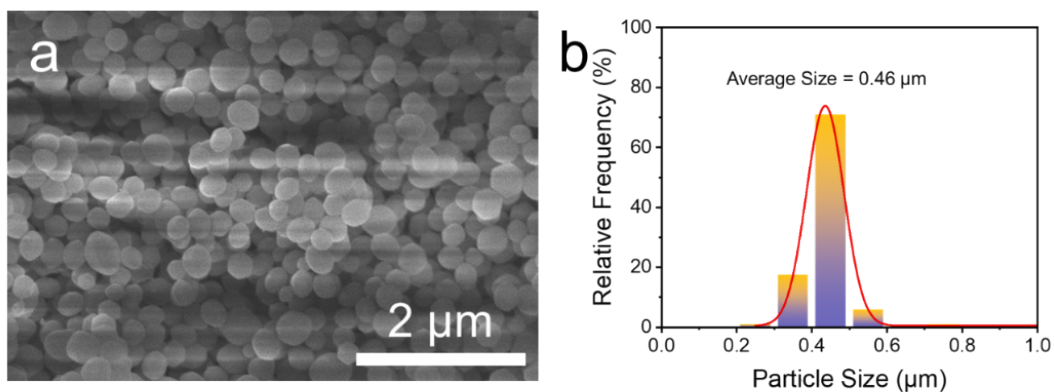

Fig. S1 (a) SEM image and (b) particle size distribution of MOF powder.

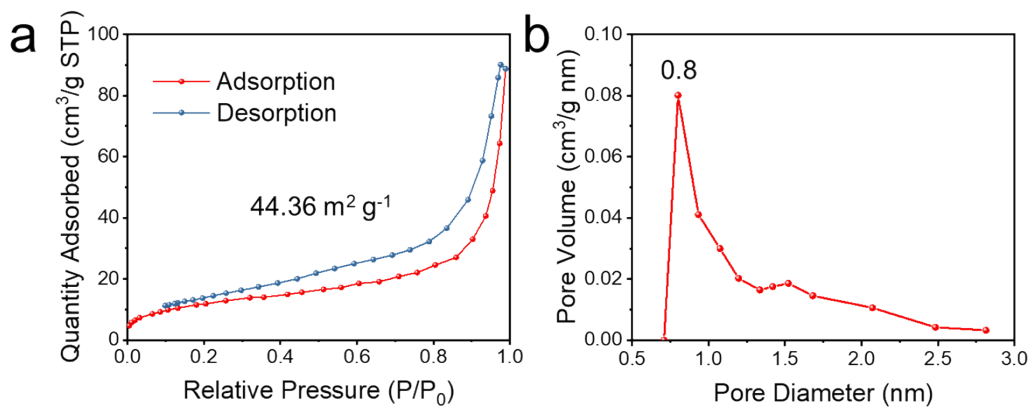

Fig. S2 (a) Nitrogen adsorption/desorption isotherms and (b) pore size distribution of MOF.

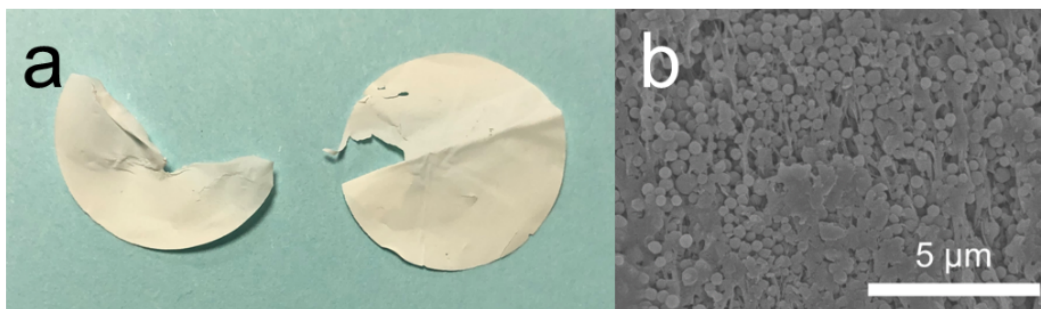

Fig. S3 (a) MOF film with a ratio of 4:1 was poorly tough and easy to break; (b) MOF film with a ratio of 2:1 had too much PVDF to cover the MOF.

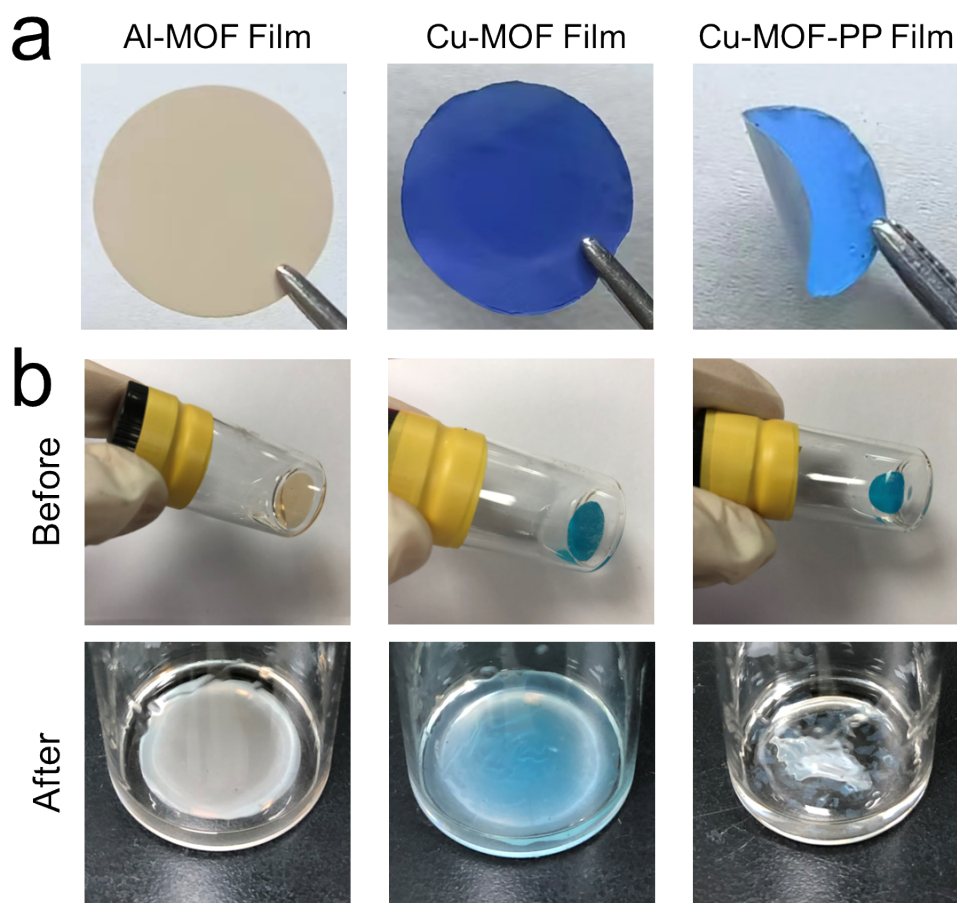

Fig. S4 (a) Photographs of Al-MOF film, Cu-MOF film, and Cu-MOF-PP film; (b) Photographs of the three films immersed in electrolyte before and after heating at 120 °C.

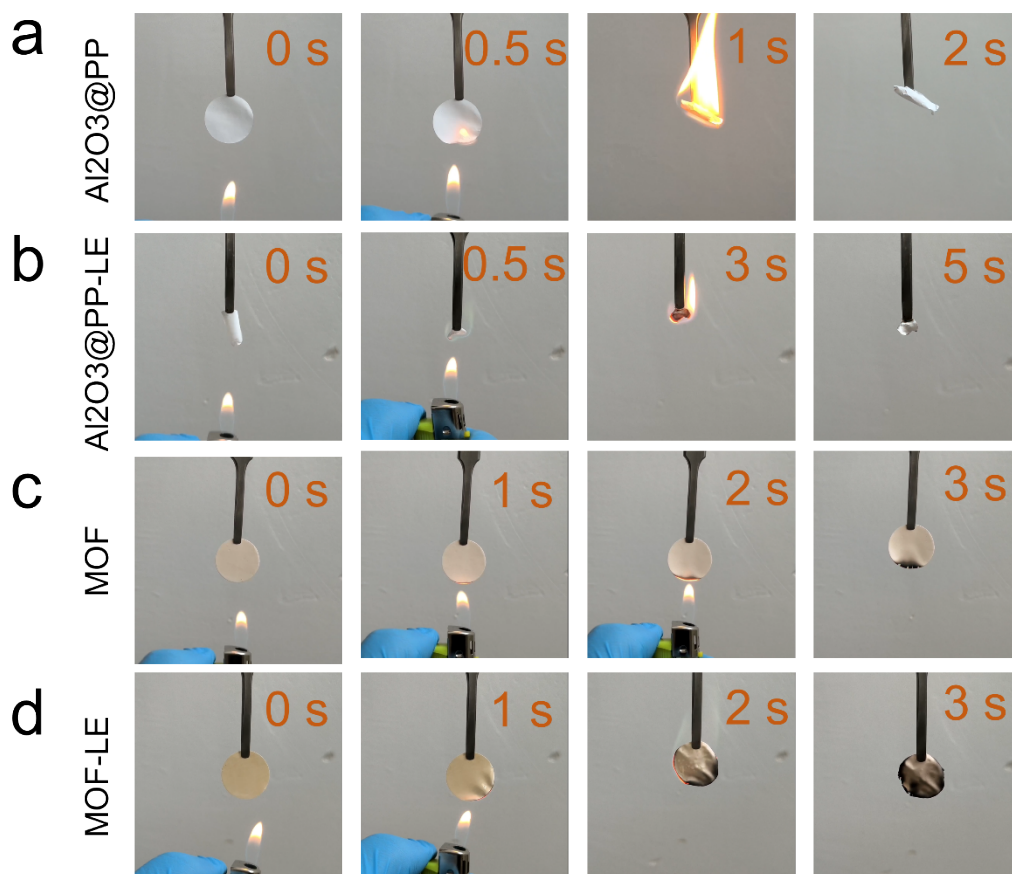

Fig. S5 Ignition tests of  $\text{Al}_2\text{O}_3@PP$  separator and MOF film before and after infiltration of electrolyte.

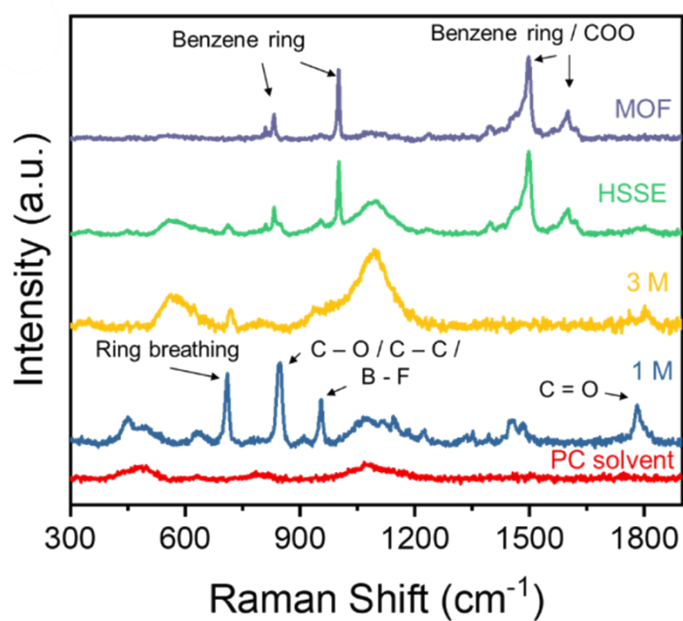

Fig. S6 Raman spectra of PC solvent, 1 M and 3 M LiDFOB-PC, MOF, and HSSE in the range of 300 to 1900  $\text{cm}^{-1}$ .

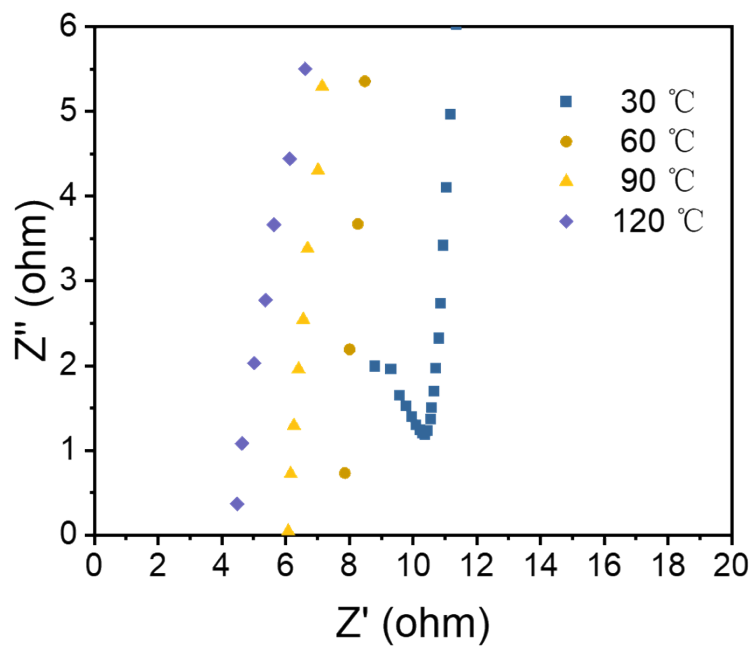

Fig. S7 Nyquist plots of SS|HSSE|SS at different temperatures.

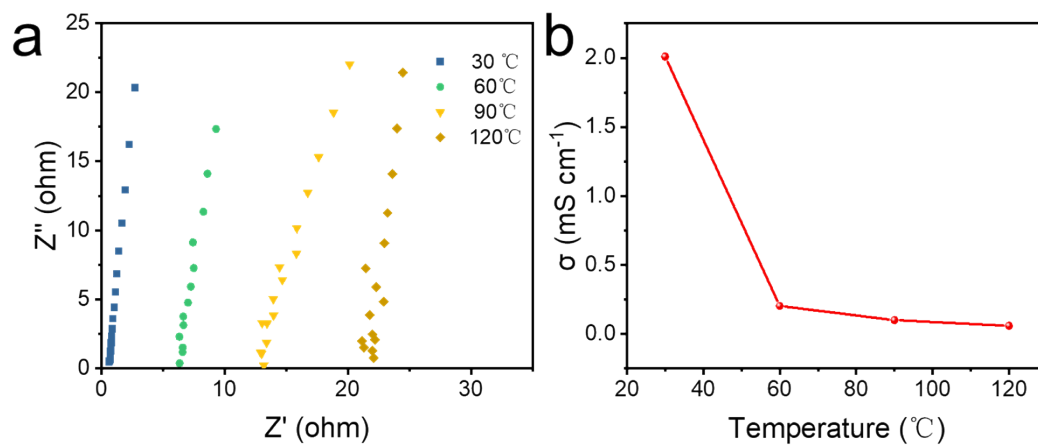

Fig. S8 (a) Nyquist plots and (b) ionic conductivity of PP-LE at different temperatures.

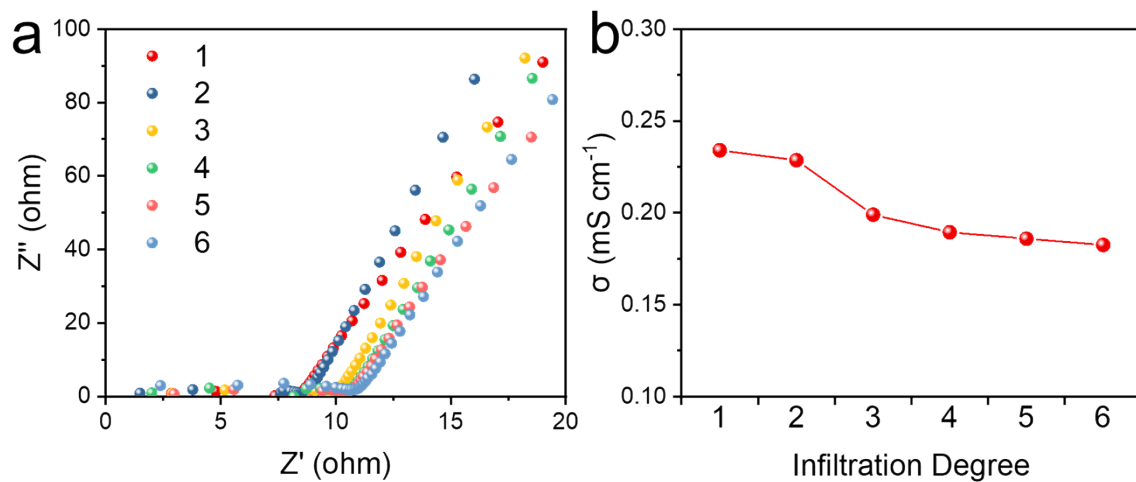

Fig. S9 EIS and ionic conductivity measured at different infiltration degrees.

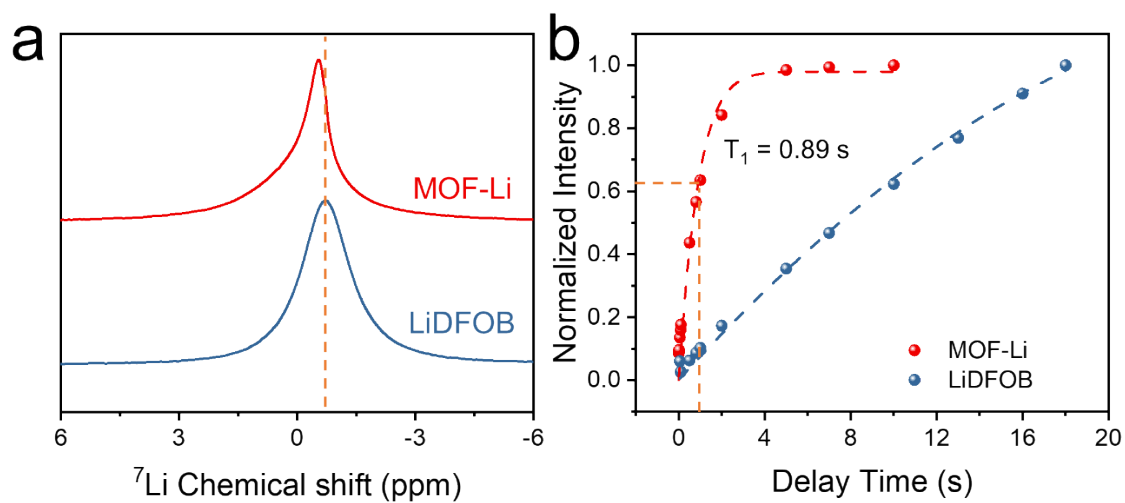

Fig. S10 (a) <sup>7</sup>Li ssNMR spectra and (b) the fitting result of  $T_1$  relaxation time of MOF-Li and LiDFOB from <sup>7</sup>Li ssNMR.

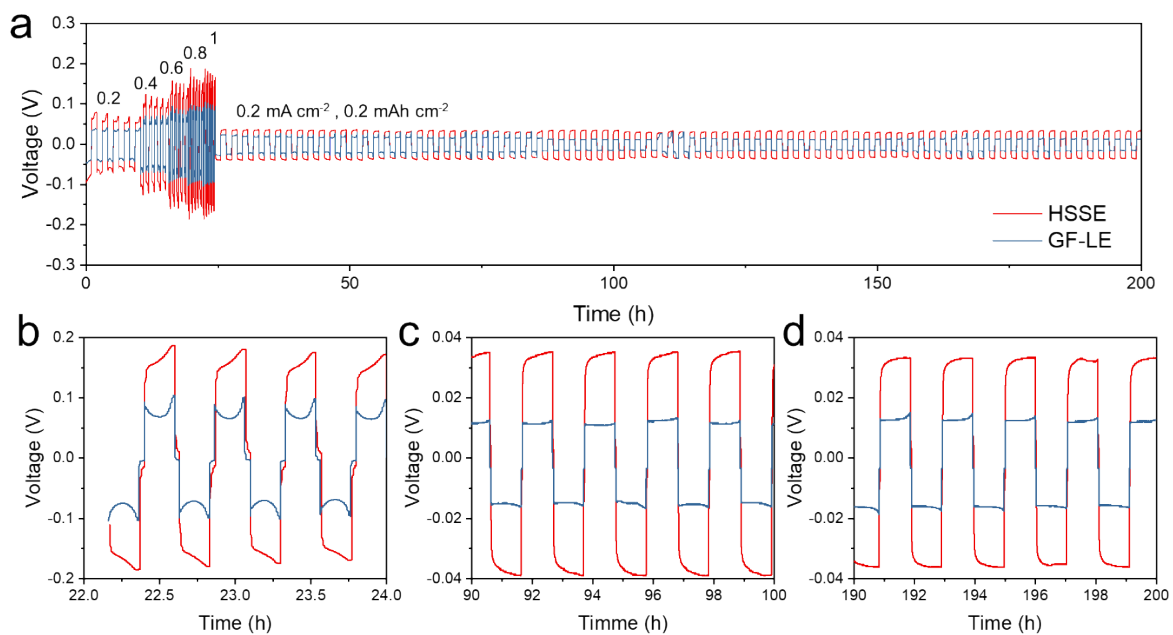

Fig. S11 Symmetrical cell performances and EIS of the Li|HSSE|Li and Li|GF-LE|Li symmetric cells.

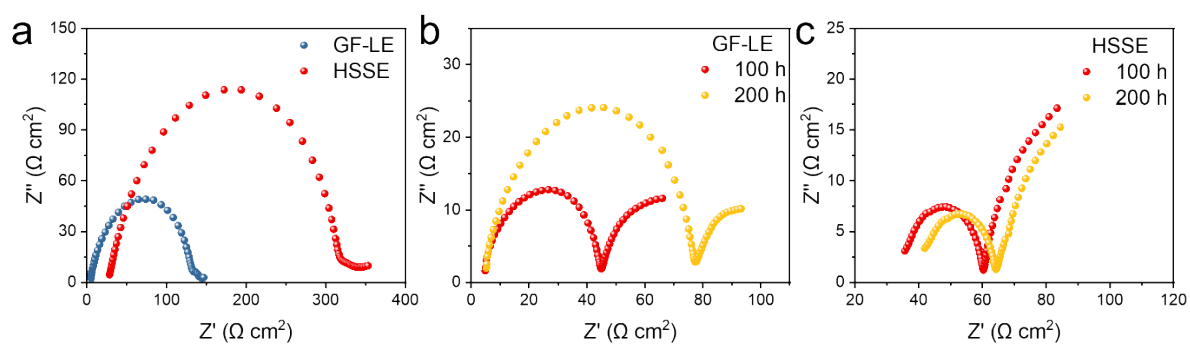

Fig. S12 The initial and after-cycle impedance of Li|HSSE|Li and Li|GF-LE|Li.

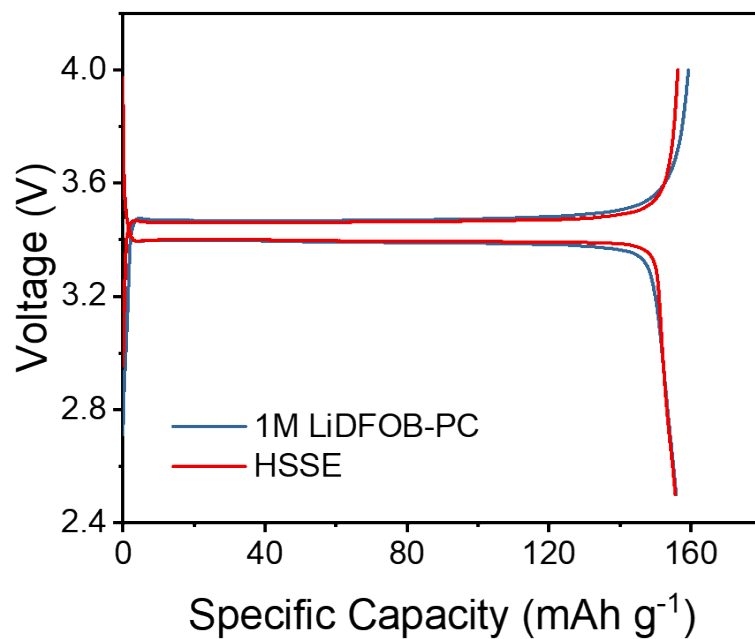

Fig. S13 First charge/discharge curves of LFP|GF-LE|Li and LFP|HSSE|Li at room temperature and 0.2 C current density.

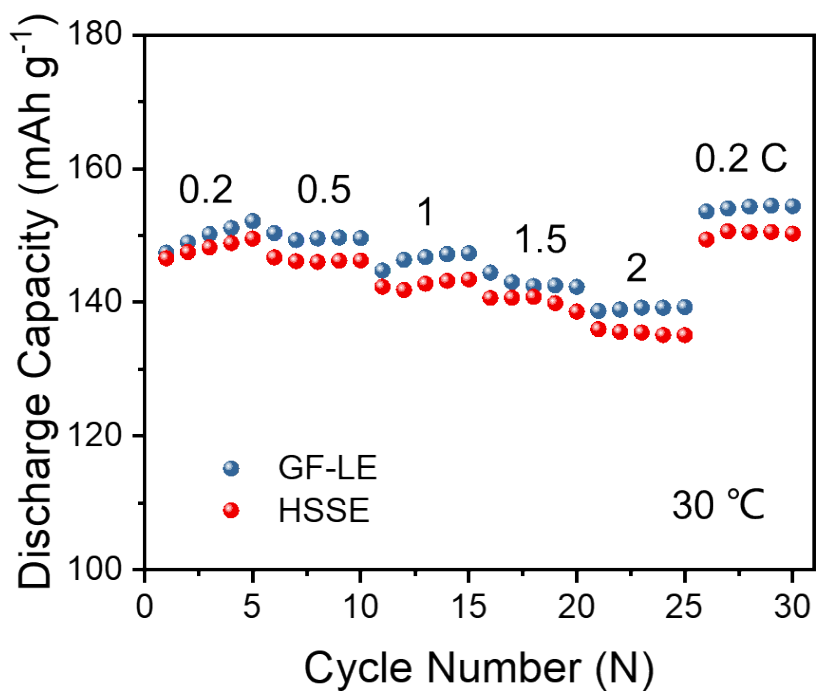

Fig. S14 Rate performance of LFP|HSSE|Li and LFP|GF-LE|Li cells at room temperature



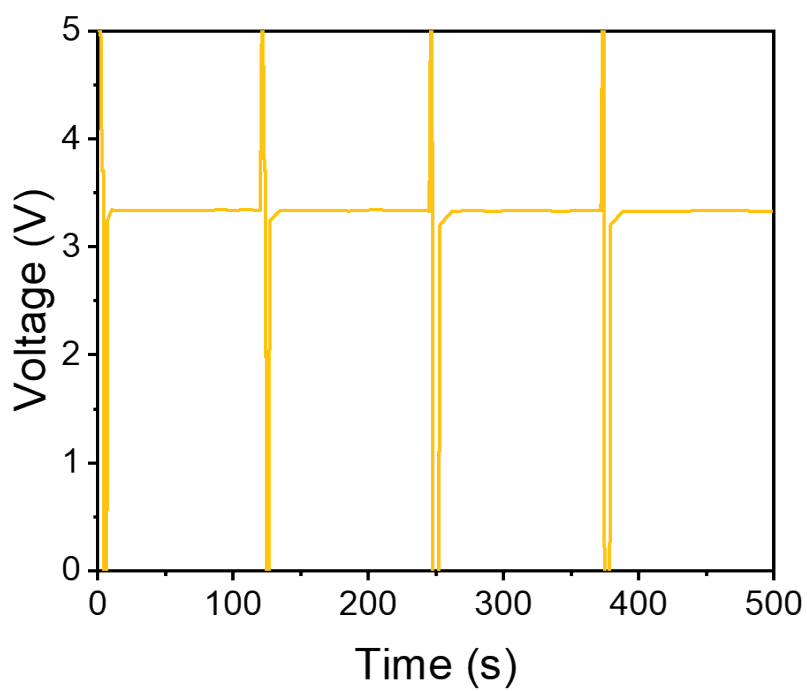

Fig. S15 Voltage profiles of LFP|HSSE(Cu)|Li cells at 120 °C.

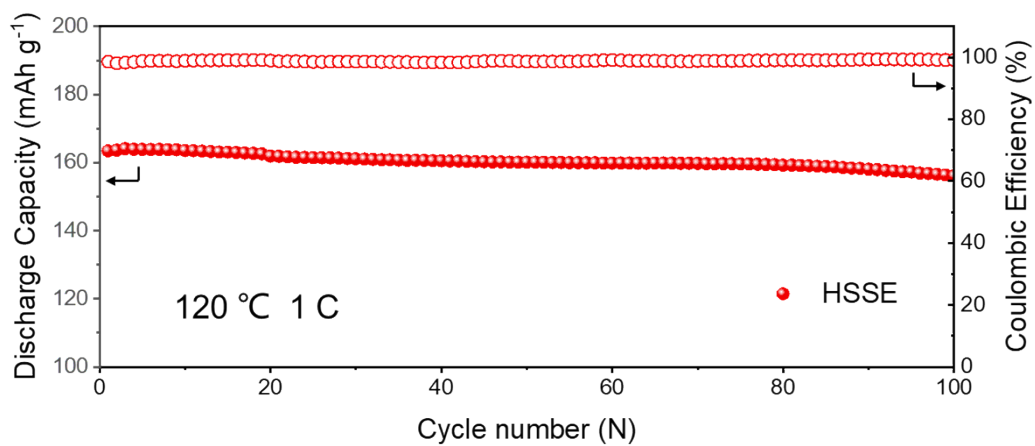

Fig. S16 Cycle performance of LFP|HSSE|Li battery at 120 °C and 1 C current density.

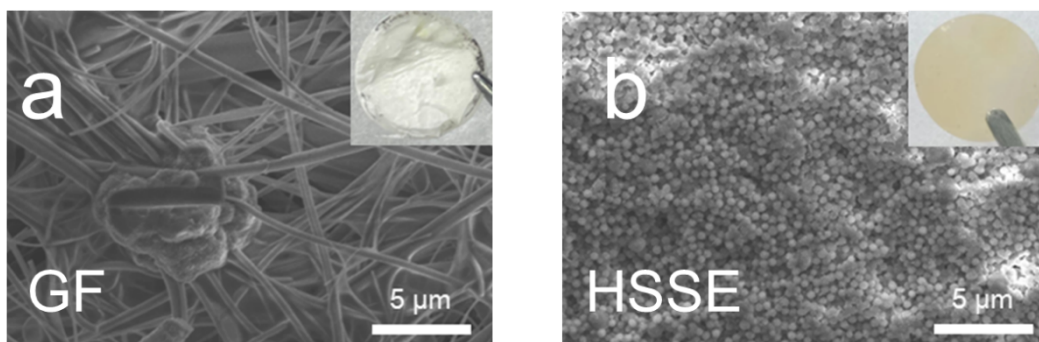

Fig. S17 Photographs and SEM images of peeled (a) glass fiber separator and (b) HSSE after cycling at 120 °C.

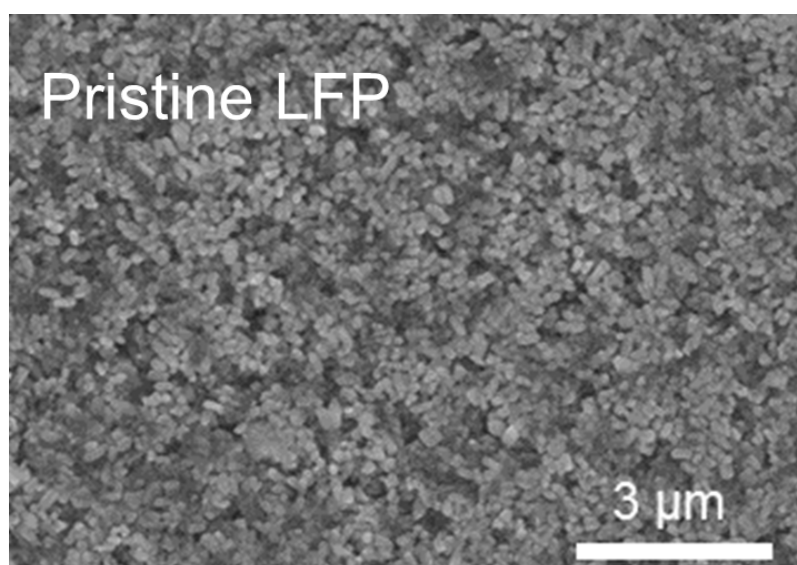

Fig. S18 SEM image of the pristine LFP cathode surface.

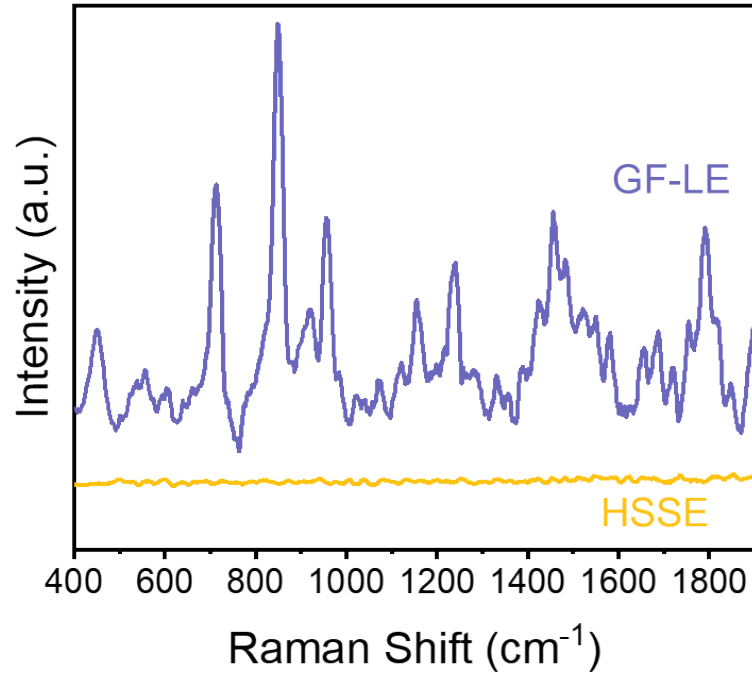

Fig. S19 Raman spectra of the surface of the lithium metal cathode after cycling in different electrolytes at 120 °C.

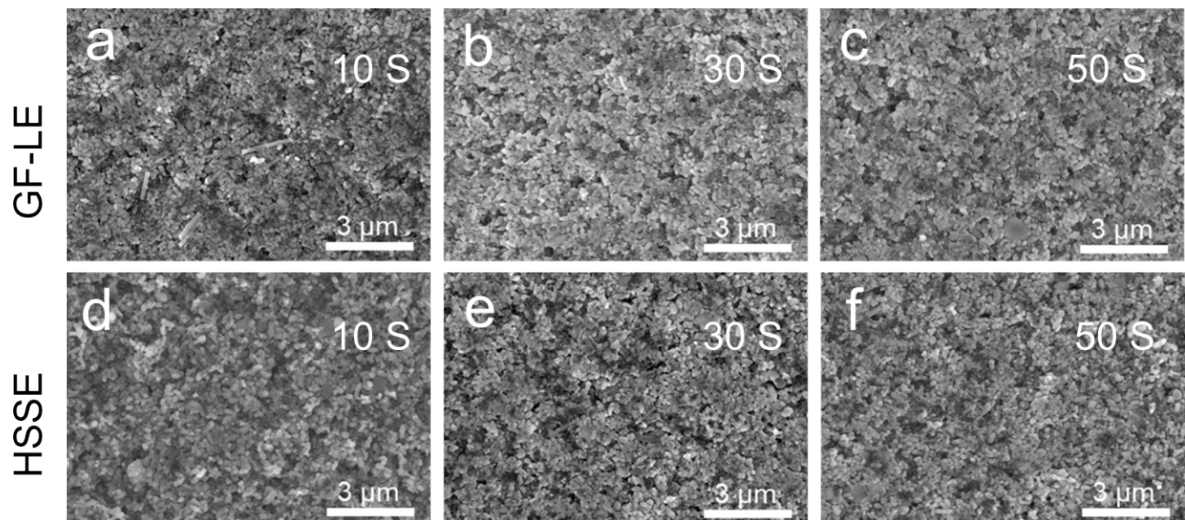

Fig. S20 SEM images of the argon etched LFP cathode surface after cycling in different electrolytes at 120 °C (a-c) GF-LE; (d-f) HSSE.

Table S1. Frontier molecular orbital theory analysis of PC and [Li-PC]<sup>+</sup>.

|                                                                                     |                                                                                     |                                                                                     |                                                                                                     |
|-------------------------------------------------------------------------------------|-------------------------------------------------------------------------------------|-------------------------------------------------------------------------------------|-----------------------------------------------------------------------------------------------------|
| Electrolytes                                                                        | 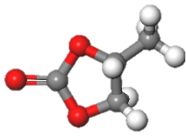   |   |                                                                                                     |
|                                                                                     | PC                                                                                  | [Li-PC] <sup>+</sup>                                                                |                                                                                                     |
| LUMO (eV)                                                                           | -0.60                                                                               | -4.95                                                                               |                                                                                                     |
| HOMO (eV)                                                                           | -8.36                                                                               | -12.83                                                                              |                                                                                                     |
|  C |  O |  H |  Li <sup>+</sup> |

Table S2. DFT calculation of the adsorption energy of activated MIL-96(Al) clusters on DFOB<sup>-</sup> and PC.

|                                                                                                                      |                                                                                                          |                                                                                             |                                                                                       |                                                                                         |                                                                                         |
|----------------------------------------------------------------------------------------------------------------------|----------------------------------------------------------------------------------------------------------|---------------------------------------------------------------------------------------------|---------------------------------------------------------------------------------------|-----------------------------------------------------------------------------------------|-----------------------------------------------------------------------------------------|
| 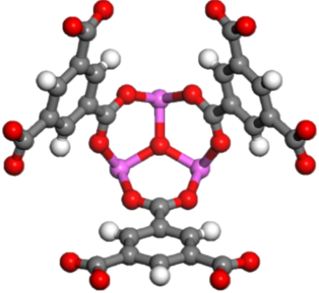<br>Activated MIL-96(Al) clusters | <br>DFOB <sup>-</sup> | <br>PC |                                                                                       |                                                                                         |                                                                                         |
|                                                                                                                      | E = -16365.517 eV                                                                                        | E = -10379.519 eV                                                                           |                                                                                       |                                                                                         |                                                                                         |
| <br>MOF-DFOB <sup>-</sup>         | <br>MOF-PC          |                                                                                             |                                                                                       |                                                                                         |                                                                                         |
|                                                                                                                      |                                                                                                          | E = -168096.803 eV                                                                          | E = -162105.464 eV                                                                    |                                                                                         |                                                                                         |
| E = -151718.872 eV                                                                                                   | E = -168096.803 eV                                                                                       | E = -162105.464 eV                                                                          |                                                                                       |                                                                                         |                                                                                         |
| E <sub>ad</sub>                                                                                                      | -12.412 eV                                                                                               | -7.071 eV                                                                                   |                                                                                       |                                                                                         |                                                                                         |
|  Al                               |  C                    |  O       |  H |  B |  F |
